# Supplementary material for: Small Glutamine-Rich Tetratricopeptide Repeat-Containing Protein Alpha (SGTA) Ablation Limits Offspring Viability and Growth in Mice
Source: PubMed Central journal article supplement (PMC4928056; doi:10.1038/srep28950), 2016-06-30
Supplement: srep28950-s1.pdf [file srep28950-s1.pdf]

1 **Small Glutamine-Rich Tetratricopeptide Repeat-Containing Protein Alpha (SGTA) Ablation**  
2 **Limits Offspring Viability and Growth in Mice**

3 Lisa K Philp<sup>1</sup>, Tanya K Day<sup>1</sup>, Miriam S Butler<sup>1</sup>, Geraldine Laven-Law<sup>1</sup>, Shalini Jindal<sup>1</sup>, Theresa E.  
4 Hickey<sup>1</sup>, Howard I Scher<sup>2</sup>, Lisa M Butler<sup>\*1,3</sup>, Wayne D Tilley<sup>\*1,3</sup>

5  
6 <sup>1</sup>Adelaide Prostate Cancer Research Centre and Dame Roma Mitchell Cancer Research Laboratories,  
7 Faculty of Health Sciences, University of Adelaide, Adelaide, Australia; <sup>2</sup> Memorial Sloan Kettering  
8 Cancer Center, New York, NY, USA; and <sup>3</sup>Freemason's Foundation Centre for Men's Health, School  
9 of Medicine, Faculty of Health Sciences, University of Adelaide, Adelaide, Australia. \*Final authors  
10 had equal contribution.

11  
12 *Corresponding Author during Submission:* Dr Lisa K Philp, Dame Roma Mitchell Cancer Research  
13 Laboratories, School of Medicine, University of Adelaide, DX Number 650 801, Adelaide, South  
14 Australia, 5000, Australia. Phone: +61 8222 3240, Fax: +61 8222 3217, Email: lisa.philp@qut.edu.au.

15 *Corresponding Author of Final Manuscript:* Professor Wayne D Tilley, Dame Roma Mitchell Cancer  
16 Research Laboratories, School of Medicine, University of Adelaide, Level 4 Hanson Institute  
17 Building, DX Number 650 801, Adelaide, South Australia, 5000, Australia. Phone: +61 8222 3252,  
18 Fax: +61 8222 3217, Email: wayne.tilley@adelaide.edu.au,

19

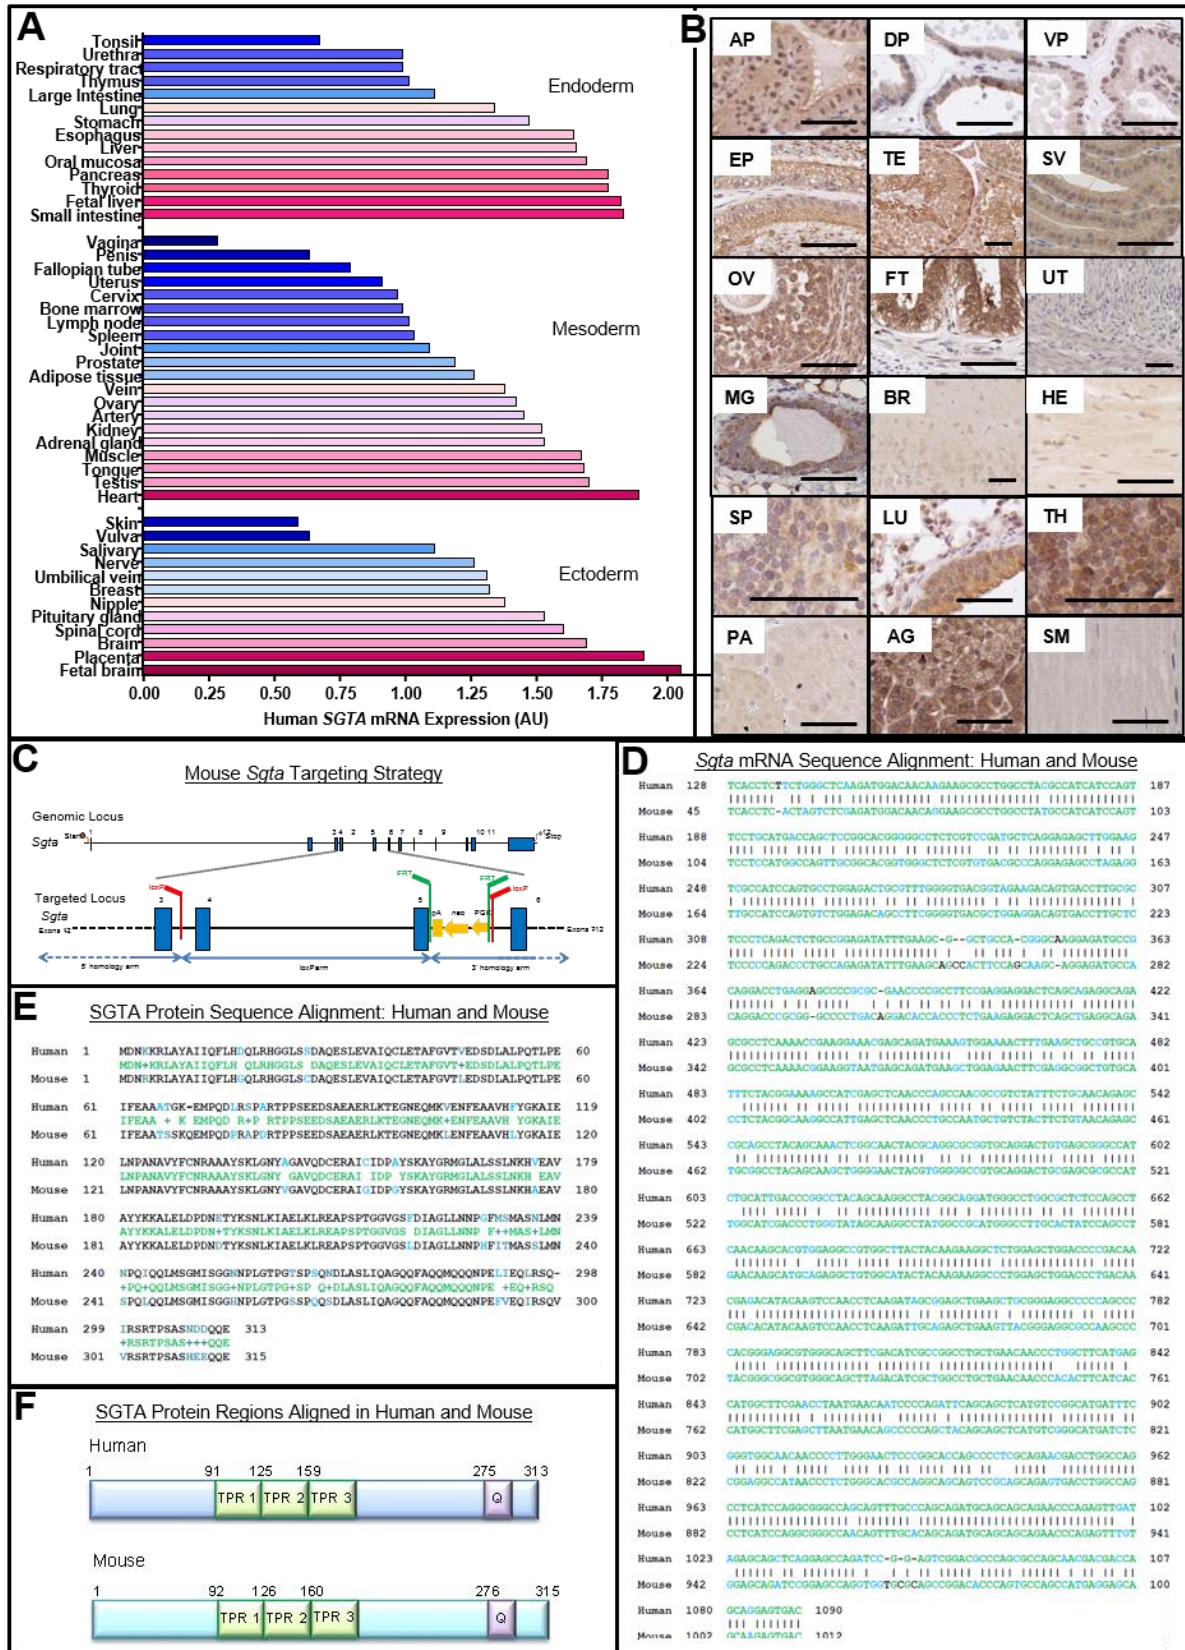

20  
 21 **Suppl Figure 1[A-F]. Generation of *Sgta*-null Mice and Comparison of SGTA mRNA and**  
 22 **Protein Sequence between *Homo sapiens* and *Mus musculus*. [A] SGTA mRNA expression in**  
 23 **normal human tissues grouped by developmental origin (endo-, meso- and ecto-derm). [B] SGTA**

24 immunostaining depicting broad protein expression in normal C57BL/6 mouse tissues [antibody  
25 dilution]: AP, anterior prostate [1:500]; DP, dorsolateral prostate [1:500]; VP, ventral prostate  
26 [1:500]; EP, epididymis [1:500]; TE, testis [1:500]; SV, seminal vesicles [1:1000]; OV, ovary [1:500];  
27 FT, fallopian tubes [1:500]; UT, uterus [1:1000]; MG, mammary gland [1:1000]; BR, brain [1:2000];  
28 HE, heart [1:500]; SP, spleen [1:500]; LU, lungs [1:500]; TH, thymus [1:500]; PA, pancreas [1:2000];  
29 AG, adrenal gland [1:500]; SM, skeletal muscle [1:1000]. Scale bars represent 50 $\mu$ m. **[C]** Schematic  
30 representation of the targeting strategy employed to ablate mouse *Sgta*. **[D]** Sequence alignment of  
31 human and mouse *Sgta* mRNA. Green letters represent 83% identity (identical residues at the same  
32 positions in an alignment), black letters (1%) represent a gap, introduced to improve alignment,  
33 compensating for insertions and deletions and blue letters (16%) represent positive residues have  
34 preserved physicochemical properties. **[E]** Sequence alignment of human and mouse SGTA protein,  
35 green letters represent 88% identity, teal letters represent 94% positives, blue letters and a gap in the  
36 central sequence represents dissimilar residues and black letters and a gap in the central sequence  
37 represents an inserted gap (0%). **[F]** Alignment of functional SGTA protein regions in human and  
38 mouse: TPR, tetratricopeptide repeat; Q, glutamine-rich domain.  
39

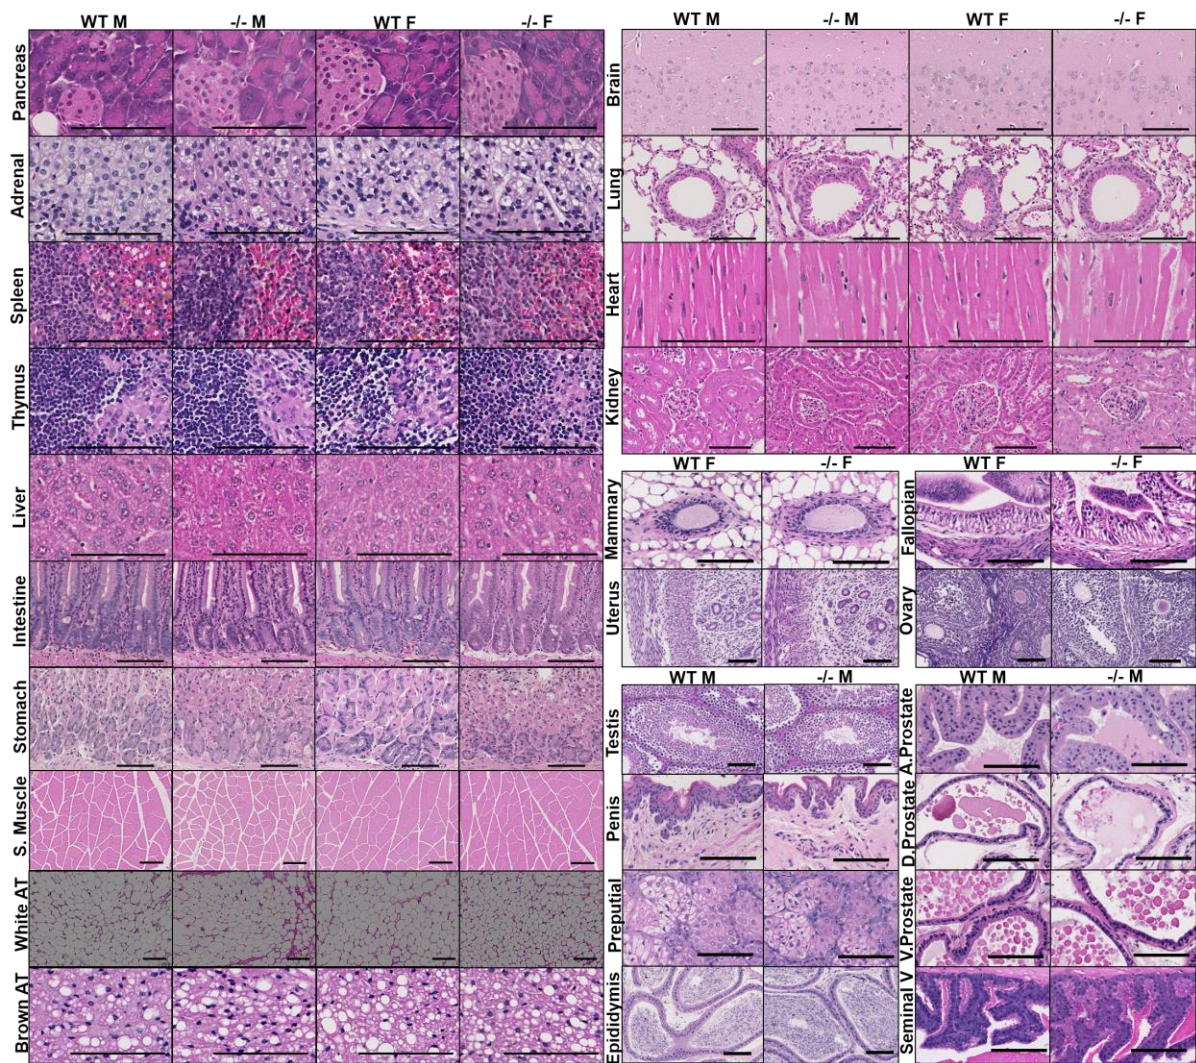

40

41 **Suppl Figure 2. Cell Morphology and Pathology of Adult Male and Female Wild-type (WT) and**  
 42 ***Sgta*-null (-/-) Organs.** Haematoxylin and Eosin stained tissue sections of the pancreas, adrenal  
 43 gland, spleen, thymus, liver, intestine, stomach, skeletal muscle (S. muscle, gastrocnemius muscle),  
 44 white adipose tissue (White AT, perirenal-retroperitoneal fat pad), brown adipose tissue (Brown AT,  
 45 interscapular brown fat pad), brain, lung, heart, kidney, in male (M) and female (F) mice;  
 46 Haematoxylin and Eosin stained female tissues, including the mammary, uterus, fallopian tube and  
 47 ovary; and male tissues, including the testis, penis, preputial gland, prostate (A, anterior lobe; D,  
 48 dorsolateral lobe; V, ventral lobe) and seminal vesicles (Seminal V). All scale bars represent 100µm.

49

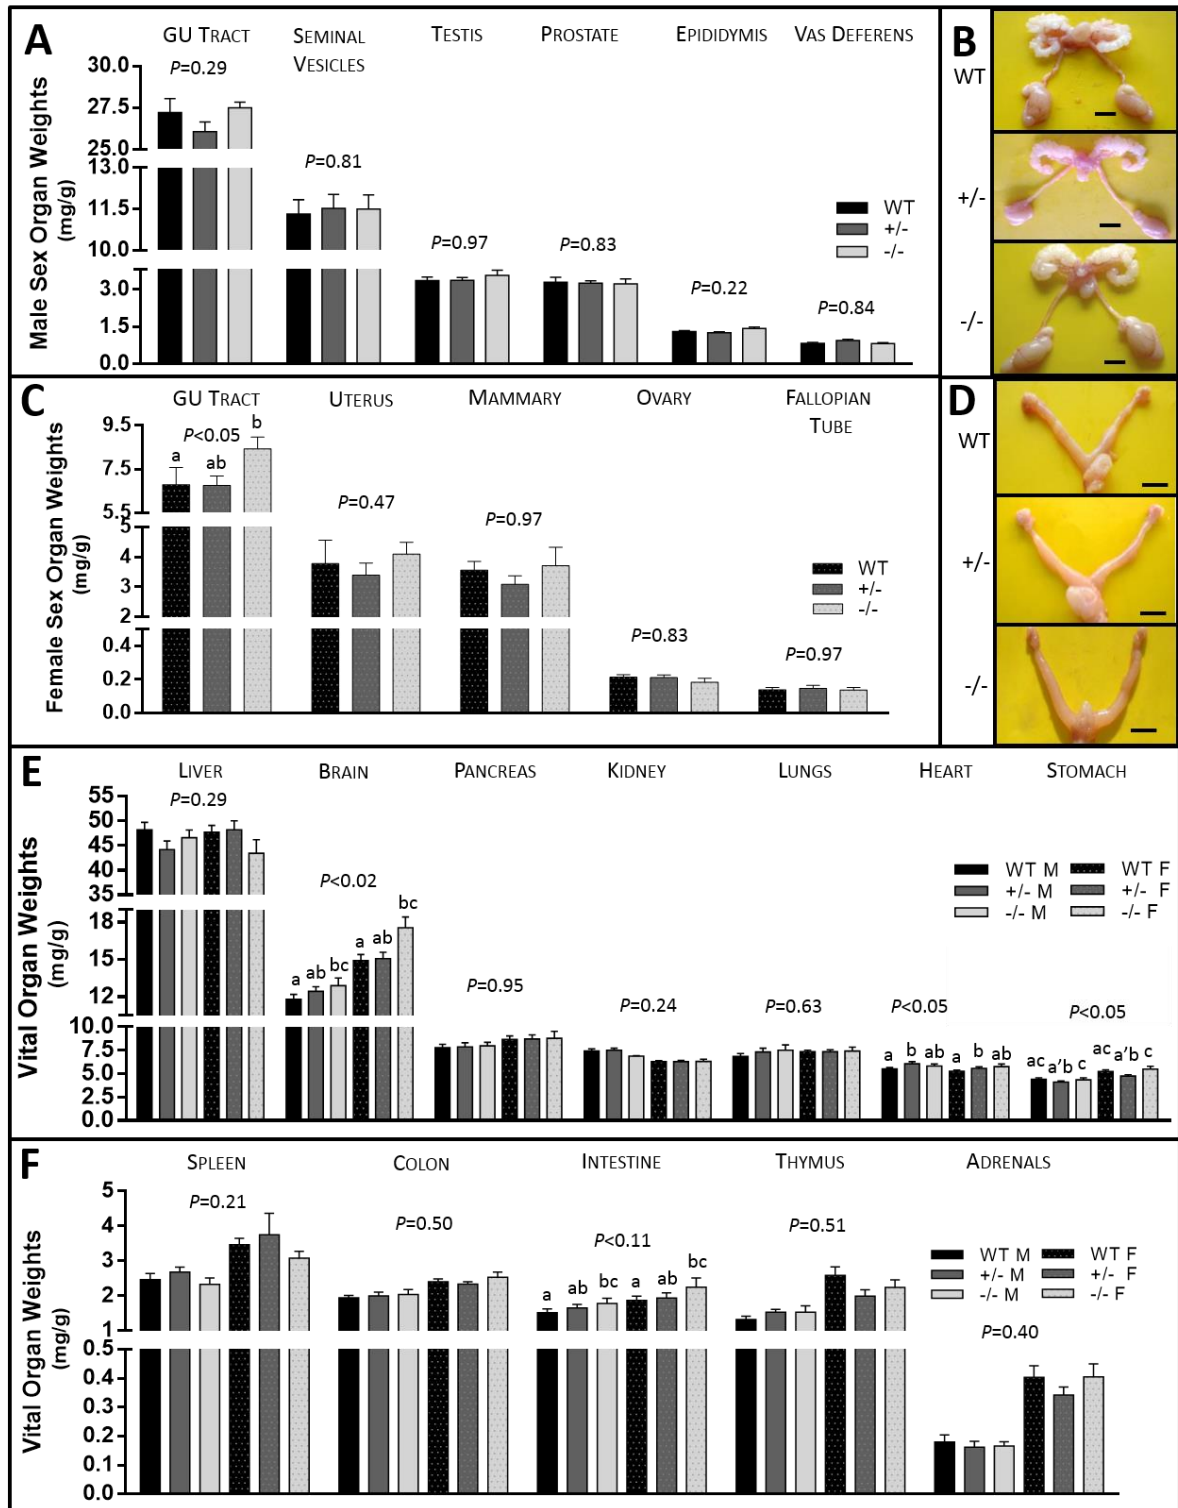

50

51 **Suppl Figure 3. Weights of Reproductive and Vital Organs in Adult *Sgta*-deficient Mice.**

52 [A]. In male (M) mice, relative weight (mg/g body weight) of the whole genitourinary (GU) tract,  
 53 seminal vesicles, testis, prostate, epididymis and vas deferens (n= 7-10/group, except prostate n=12-  
 54 15/group). WT, wild-type, +/-, *Sgta*<sup>+/-</sup> and -/-, *Sgta*<sup>-/-</sup>. [B] Representative male genitourinary tract  
 55 relative to genotype. Scale bar = 5 mm. [C] In female (F) mice, relative weight (mg/g body weight) of

56 the whole genitourinary (GU) tract, uterus, mammary, ovary and fallopian tube (n = 8-9/group GU,  
57 uterus; n=8-14/group ovary, mammary, fallopian tube). Means with different letters are significantly  
58 different,  $P<0.05$ . **[D]** Representative female genitourinary tract relative to genotype. Scale bar = 5  
59 mm. **[E]** Relative weight (mg/g body weight) of vital organs, the liver, brain, pancreas, kidney, lungs,  
60 heart and stomach (n=7-9/group). Means with different letters are significantly different,  $P<0.05$ ; a'  
61 trend,  $P<0.06$ , +/- vs WT. **[F]** Relative weight (mg/g body weight) of more vital organs, the spleen,  
62 colon, intestine, thymus and adrenals (n=7-10/group). Means with different letters are significantly  
63 different,  $P<0.05$ .

64

| <b>Suppl Table 1. Target and Reference* Gene Primer Sequences (Forward, FWD; Reverse, REV) utilised for mRNA Expression Analyses by qRT-PCR and their Optimised Annealing Temperature.</b> |                             |                             |                            |
|--------------------------------------------------------------------------------------------------------------------------------------------------------------------------------------------|-----------------------------|-----------------------------|----------------------------|
| <b>Gene Symbol &amp; Accession #</b>                                                                                                                                                       | <b>FWD Sequence (5'-3')</b> | <b>REV Sequence (5'-3')</b> | <b>Annealing Temp (°C)</b> |
| <b>Ar</b><br>(NM_013476)                                                                                                                                                                   | TCCCAGTCCCAATTGTGTCAA       | TCGATGGGTAAAACATGGTCC       | 58.0                       |
| <b>Dnajc7</b><br>(NM_019795)                                                                                                                                                               | AATGGCGGCATGTCGTAGTT        | CATGACGGCATTGGCGTT          | 58.0                       |
| <b>Fkbp4</b><br>(NM_010219)                                                                                                                                                                | GAGTGGACATCAGCCCCAAA        | CAAAGACTCGGTCCCCGAT         | 62.5                       |
| <b>Fkbp5</b><br>(NM_010220)                                                                                                                                                                | CACGACATTCCGATTGGGAT        | CCAAACTTAGGCTTCCCGG         | 61.5                       |
| <b>Ghr</b><br>(NM_010284)                                                                                                                                                                  | CTGCAAAGAATCAATCCAAGCC      | CAGTTCAGGGGAACGACTT         | 60                         |
| <b>Hp-1</b><br>(NM_017370)                                                                                                                                                                 | GCTATGTGGAGCACTTGGTTC       | CACCCATTGCTTCTCGTCGTT       | 67                         |
| <b>Igf-1</b><br>(NM_184052)                                                                                                                                                                | CACTCATCCACAATGCCTGT        | TGGATGCTCTTCAGTTCGTG        | 60.5                       |
| <b>Igf-1r</b><br>(NM_010513)                                                                                                                                                               | CATGTGCTGGCAGTATAACCC       | TCGGGAGGCTTGTTCCT           | 60.5                       |
| <b>Odc1</b><br>(NM_013614)                                                                                                                                                                 | GACGAGTTTGACTGCCACATC       | CGCAACATAGAACGCATCCTT       | 61.1                       |
| <b>Ppid</b><br>(NM_026352)                                                                                                                                                                 | ACCGGGAAGCCTCTCCATT         | TTCGCCACCTGTCCCATT          | 59.0                       |
| <b>Ppp5c</b><br>(NM_011155)                                                                                                                                                                | TCAAGACACAGGCCAACGACTA      | ATTGCCGGGGTTCAACTCGAT       | 63.0                       |
| <b>Rhox5</b><br>(NM_008818)                                                                                                                                                                | CATTTTGCAGCGCACTAATTCC      | AGCCCTCCTGATCTTAAACCA       | 61.5                       |
| <b>Sgta Exon1-3</b><br>(NM_024499)                                                                                                                                                         | GTCTTCGGTTCGACTGAGAGAT      | GCCATGGAGGAAGTGGATGA        | 60.0                       |
| <b>Sgta Exon 4-5</b><br>(NM_024499)                                                                                                                                                        | GACAGGACACCACCTCTGAA        | TTGCCGTAGAGGTGCACAGC        | 60.0                       |
| <b>Sgtb</b><br>(NM_144838)                                                                                                                                                                 | GGCTGAGGTTTGAGATGGCTA       | CATCATCCCTGACATTAGCTGC      | 61.5                       |
| <b>Stub1</b><br>(NM_019719)                                                                                                                                                                | TACACTGCCACAAGTGGGTT        | GCGCAAGAGCTCAAGGAG          | 57.4                       |
| <b>Actb*</b><br>(NM_007393)                                                                                                                                                                | GGCTGTATTCCCCTCCATCG        | CCAGTTGGTAACAATGCCATGT      | 64.5                       |
| <b>Gapdh*</b><br>(NM_017008)                                                                                                                                                               | TGCCGCCTGGAGAAACCTG         | CTGTTGAAGTCACAGGAGAC        | 58.0                       |
| <b>Tbp*</b><br>(NM_013684)                                                                                                                                                                 | CCTTGTACCCTTCACCAATGAC      | ACAGCCAAGATTCACGGTAGA       | 60.0                       |
| <b>Tfrc*</b><br>(NM_011638)                                                                                                                                                                | GGACTGTAGAGGCGCTTCCTA       | GGGTGTATGACAATGGTTCCC       | 60.0                       |
| <b>Hprt1*</b><br>(NM_012583)                                                                                                                                                               | CCTTGACTATAATGAGCACTTC      | GCCACATCAACAGGACTC          | 56.4                       |
